# Supplementary material for: Induction of a CD8+ T-cell response to the MAGE cancer testis antigen by combined treatment with azacitidine and sodium valproate in patients with acute myeloid leukemia and myelodysplasia
Source: Oxford University Press journal article supplement (doi:10.1182/blood-2009-11-249474), 2010-06-09
Supplement: zh1908-sup-document1.pdf [file zh1908-sup-document1.pdf]

**Table S1. Sequence of primers used in the qRT-PCR analysis of cancer testis antigen expression**

| Primer   | Sequence                      |
|----------|-------------------------------|
| SPANXB   | AAT GAG GCC AAC AAG ACG AT    |
|          | TCC TCC TGT AGC GAA CCA CT    |
| SACA3    | GCC GGA TGT ACT GCT CAG AT    |
|          | TGG GTT ATC TTC ATG GCA CA    |
| PRAME    | GCT GTG CTT GAT GGA CTT GA    |
|          | TAC AGA CTG GCC CTG TTT CC    |
| PASD1    | CCT TTT GTG GGA GAG CTC AG    |
|          | GGT TCA ACG TAC ACG GCT TT    |
| MAGEA1   | TCT GTG AGG AGG CAA GGT TT    |
|          | TCT CCT TGG TGC TCC TCT GT    |
| GAGE     | GAT AGC CAG GAA CAG GGT CA    |
|          | TTC ACC TCC TCT GGA TTT GG    |
| MAGEA4   | ACA GAG GAG CAC CAA GGA GA    |
|          | AAG AGT GCA GGC AAA AGC TG    |
| SSX-1    | AAT CAT CCC GAA GAT CAT GC    |
|          | GCA GTT GTT TCC CAT CGT TT    |
| MAGEA3   | GGA GGA GCA CTG AAG GAG AA    |
|          | ATG ACT CTG GTC AGG GCA AC    |
| NY-ESO-1 | CAC TGT GTC CGG CAA CAT AC    |
|          | GGA GAC AGG AGC TGA TGG AG    |
| SPA17    | GGA GGA AGA GAC ATC AGT CAC C |
|          | GCC TCC TCT CTG GCT ATG TG    |
| MAGEC1   | GAG GAT CGT CTC AGG TCA GC    |
|          | AAC TCC TGC TTT CTG GAG CA    |
| LAGE     | GTG TCC GGC AAC CTA CTG TT    |
|          | GGA GAC AGG AGC TGA TGG AG    |
| b-Actin  | GTC TTC CCC TCC ATC GTG       |
|          | CGC CCA CAT AGG AAT CCT TC    |
| WT1      | CAG GCC AGG ATG TTT CCT AA    |
|          | GAC CGT GCT GTA ACC CTG AT    |
| XAGE     | CCC AAA AAG AAG AAC CAG CA    |
|          | GCT CTT GCA GAT CAC CTT CC    |
| HAGE     | TGG GCA GAT TTA CCA CCA AT    |
|          | CCT TCA AGT CAT CCC ACG TT    |

**Table S2. Summary of antigenic peptides utilised in the CD137 detection and enrichment assay used to analyze the CD8<sup>+</sup> T-cell response to CTAgS in 21 patients with AML or MDS**

| Peptide Pool | Gene and position                | HLA (I) restriction | HLA frequency (%) within the population | Peptide sequence |
|--------------|----------------------------------|---------------------|-----------------------------------------|------------------|
| B            | <b>BAGE-1</b><br>-<br>2-10       | Cw16                | 7                                       | AARAVFLAL        |
| C            | <b>MAGE-A1</b><br>-<br>96-104    | A3                  | 23                                      | SLFRAVITK        |
| C            | 135 – 143                        | A24                 | 19                                      | NYKHCFPEI        |
| B            | 161 – 169                        | A1                  | 26                                      | EADPTGHSY        |
| C            | 289 – 298                        | B7                  | 17                                      | RVRFFFPSL        |
| A            | <b>MAGE-A2</b><br>-<br>157 – 166 | A2                  | 44                                      | YLQLVFGIEV       |
| A            | 212-220                          | Cw7                 | 41                                      | EGDCAPEEK        |
| C            | <b>MAGE-A3</b><br>-<br>97 – 105  | A24                 | 19                                      | TFPDLESEF        |
| B            | 112 -120                         | A2                  | 44                                      | KVAEELVHFL       |
| C            | 168 – 176                        | A1                  | 26                                      | EVDPIGHLY        |
| B            | 167-176                          | B18/B44             | 6,21                                    | MEVDPIGHLY       |
| A            | <b>MAGE-C2</b><br>-<br>336-344   | A2                  | 44                                      | ALKDVEERV        |
| A            | <b>RAGE-1</b><br>-<br>11-20      | B7                  | 17                                      | SPSSNRIRNT       |
| A            | 32-40                            | A2                  | 44                                      | PLPPARNGGL       |
| B            | 352-360                          | A2                  | 44                                      | LKLSGVVRL        |
